# Supplementary material
Source: HighWire-hosted journal article supplement (doi:10.1101/rna.079707.123)
Supplement: Supplemental_Figure_Legends.docx [file Supplemental_Figure_Legends.docx]

**Supplementary Figures**

**Figure S1**. Presence of a myc tag on subunits Tho2 and Hpr1 of THO complex does not influence Rho-induced growth defect, transcript degradation or protein level. (A) Serial dilution test performed on strains with a C-terminal myc tag on the subunits of THO transformed either with a plasmid without Rho expression or the plasmid expressing Rho. Removal of Rrp47 by gene deletion induces a depletion of Rrp6 (the rrp6Δ strain is known to be temperature sensitive and to have a slow growth as well as a slight genetic instability), (B) Northern blot analyses of total RNA extracts from strains with myc-tagged members of THO complex grown in Rho-repressing or inducing conditions. (C) Western blot analyses of whole protein extracts isolated from strains harboring myc-tagged THO grown under Rho-inducing or repressing conditions and detected with anti-myc antibodies (*α-myc*). The experiment was performed and Rho and Tfs1 were detected.

**Figure S2.** The histogram shows the level of *IZH4*, *HXT6* and *GAC1* mRNA relative to 18 S rRNA as determined by quantitative RT-PCR and by setting the value of mRNA signal to 1 for the wild-type strain in the absence of Rho expression. The average of three independent experiments is shown, with *error bars* representing the standard deviation (SD) while asterisks denote the calculated p-value, * p<0.05.

**Figure S3.** IGV snapshots of ChIP-Seq peaks of Rrp6 and THO subunits (Tho2, Hpr1, Mft1) in wild-type and tho2 strains over protein-coding loci, in cells expressing or not expressing the Rho helicase. These snapshots illustrate that *tho2* cells mostly fail to recruit Rrp6 to local transcripts. The y-axis corresponds to the mapped read counts. All mapped reads are shown on the right.

**Figure S4.** IGV snapshots of Rrp6 ChIP-Seq peaks in wild-type, *tho2Δ1408-1597* and *tho2Δ1271-1597* cells over protein-coding loci, in cells expressing or not expressing the Rho helicase. These snapshots illustrate the importance of the Tho2 C-terminal domain in recruiting Rrp6. The y-axis corresponds to the mapped read counts. All mapped reads are shown on the right.

**Figure S5.** IGV snapshots of ChIP-Seq peaks of Rrp6 and THO subunits (Tho2, Hpr1, Mft1) over protein-coding loci, in cells expressing or not expressing the Rho helicase. These snapshots illustrate altered levels of Rrp6 and THO subunits upon the induction of the Rho helicase and the overlap between Tho2 and Rrp6 ChIP-Seq peaks. The y-axis corresponds to the mapped read counts. All mapped reads are shown on the right.
