# Supplementary material
Source: HighWire-hosted journal article supplement (doi:10.1101/rna.079707.123)
Supplement: Supplemental_Table_S1.docx [file Supplemental_Table_S1.docx]

**Table S1. Primers**

| **Primer ID** | **Sequence (5'→3')** | **Template** | **Description** |
| --- | --- | --- | --- |
| tho2::kana S1 | GTTGATACATATTCGCACCAGTATACATTTTCAGGACTTTATGCGTACGCTGCAGGTCGAC | pFA6a-kanMX4 | Deletion of *THO2* |
| tho2::kana S2 | CAAAGTACACGTTAAAATTCAGCTCGGGTATGTTAAGTACTAGTAATTAATCGATGAATTCGAGCTCG | pFA6a-kanMX4 |
| hpr1::hph S1 | GATGATTTTA ACAATTCAAG AGGCATTAAAACTTGGGCAA AGGAGTAATAATGCGTACGCTGCAGGTCGAC | pFA6a-kanMX4 | Deletion of *HPR1* |
| hpr1::hph S2 | ATAGTGGAAA CCGACGCCCC AGCACTCGTC CGAGGGCAAA GGAATAATCTATCGATGAATTCGAGCTCG | pFA6a-kanMX4 |
| mft1::kana S1 | CTGTAAAAAAGGAATCAAAGAACTAAAGCCAAAGGAGACTAACTCACAATGCGTACGCTGCAGGTCGAC | pFA6a-kanMX4 | Deletion of *MFT1* |
| mft1::kana S2 | CTATATGCCTTTTCTATTTAGTAAGAGCTATGCATTATACGTGGTCAATCGATGAATTCGAGCTCG | pFA6a-kanMX4 |
| *tho2Δ1271-1597::kana S1* | TCGCAAAGACTTCAAAATGATCCACCCAAAAGTGTTGCAAGCGGCAGTGCTGGATTAAATAGCCGCTGCAGGTCGAC | pFA6a-kanMX4 | *Deletion tho2Δ1271-1597* |
| *tho2Δ1271-1597::kana S2* | CAAAGTACACGTTAAAATTCAGCTCGGGTATGTTAAGTACTAGTAATTAATCGATGAATTCGAGCTCG | pFA6a-kanMX4 |
| *tho2Δ1408-1597::kana S1* | AGCTCATATTCTGAAGCTGCTGCTCCTGAATATACCAAAAGATCAAGTAGGTACCGCTGCAGGTCGAC | pFA6a-kanMX4 | *Deletion tho2Δ1408-1597* |
| *tho2Δ1408-1597::kana S2* | CAAAGTACACGTTAAAATTCAGCTCGGGTATGTTAAGTACTAGTAATTAATCGATGAATTCGAGCTCG | pFA6a-kanMX4 |
| THO2-Myc S3 | CCGCAAGGTCCCAAGGGTGGGAATTACGTCAGTAGGTACCAGAGGCGTACGCTGCAGGTCGAC | pYM18 | Tagging of Tho2 |
| THO2-Myc S2 | GTACACGTTAAAATTCAGCTCGGGTATGTTAAGTACTAGTAATTAATCGATGAATTCGAGCTCG | pYM18 |
| HPR1-Myc S3 | GCTACTTCGAACATTTCTAATGGTTCATCTACCCAAGATATGAAACGTACGCTGCAGGTCGAC | pYM18 | Tagging of Hpr1 |
| HPR1-Myc S2 | TGCATGAATTTCTTATCAGTTTAAAATTTCTATTAAGAGGATAATTTAATCGATGAATTCGAGCTCG | pYM18 |
| MFT1-Myc S3 | GGCACTACAAGCGATTTTAGTGCGTCTTCCTCTGTTGAAGAAGTAAAACGTACGCTGCAGGTCGAC | pYM18 | Tagging of Mft1 |
| MFT1-Myc S2 | CTATATGCCTTTTCTATTTAGTAAGAGCTATGCATTATACGTGGTCAATCGATGAATTCGAGCTCG | pYM18 |
| THP2-Myc S3 | CCATCGGAAAGCTATCCTGTAGATAAAGAAGGTGACATAGTTTTAGAACGTACGCTGCAGGTCGAC | pYM18 | Tagging of Thp2 |
| THP2-Myc S2 | GTATAACTCTATCTAACTTGTGCAGGCTGGTTAAATAAAATGTGCTTAATCGATGAATTCGAGCTCG |  |
| THO2ΔC12-Myc S3 | GCAAAGACTTCAAAATGATCCACCCAAAAGTGTTGCAAGCGGCAGTGCTGGATTAAATCGTACGCTGCAGGTCGAC | pYM18 | Tagging of Tho2ΔC1271-1597 |
| THO2ΔC12-Myc S2 | GTACACGTTAAAATTCAGCTCGGGTATGTTAAGTACTAGTAATTAATCGATGAATTCGAGCTCG | pYM18 |
| THO2ΔC14-Myc S3 | AGATACGACTAGCTCATATTCTGAAGCTGCTGCTCCTGAATATACCAAAAGATCAAGTAGGCGTACGCTGCAGGTCGAC | pYM18 | Tagging of Tho2ΔC1408-1597 |
| THO2ΔC14-Myc S2 | GTACACGTTAAAATTCAGCTCGGGTATGTTAAGTACTAGTAATTAATCGATGAATTCGAGCTCG | pYM18 |
| PMA1 F-1010_fwd | GTTTGCCAGCTGTCGTTACCACCAC | - | ChIP qPCR |
| PMA1 R-1235_rev | GCAGCCAAACAAGCAGTCAACATCAAG | - |
| PMA1 F 2251_for | AACCTACCAAGATTATGGGGTATGTC | - | ChIP qPCR |
| PMA1 R 2532_rev | CCAACCGAATAAGGTAAACATGGTAGCGATG | - |
| PMA1_for | 5′-CAATCTAATCACGGTGTCGACGACGAAGAC | - | Northern blot |
| PMA1_rev | 5′-GAAGAGGATGATGTATCAGTCAT | - | Northern blot |
| 18S_for | 5′-GAACTTTGGGCCCGGTTG | - | Northern blot |
| 18S_rev | 5′-AGGTTAAGGTCTCGTTCG | - | Northern blot |
| IZH4-F | 5′-CAAAGCCCAGTCAAATGCGA | - | RT-qPCR |
| IZH4-R | 5′-TTGTAGTGGTGGTGGGGAAC | - | RT-qPCR |
| HXT6-F | 5′-TGGTGAAGGTGAAGAGCACG | - | RT-qPCR |
| HXT6-R | 5′-TCCCAACCGAAAACGAAACC | - | RT-qPCR |
| GAC1-F | 5′-TCACTGGCTACTCAGGCAAC | - | RT-qPCR |
| GAC1-R | 5′-TGCAAATCGGAGGCCGATAA | - | RT-qPCR |
